# Supplementary material for: Open-aqueduct LOVA, LIAS, iNPH: a comparative clinical-radiological study exploring the “grey zone” between different forms of chronic adulthood hydrocephalus
Source: Springer Nature journal article supplement (doi:10.1007/s00701-022-05215-9), 2022-04-27
Supplement: MOESM1 [file 701_2022_5215_MOESM1_ESM.pdf]

*Open – aqueduct LOVA, LIAS, iNPH: a comparative clinical - radiological study exploring the “grey zone” between different forms of chronic adulthood hydrocephalus.*

Giorgio Palandri<sup>1\*</sup>, Alessandro Carretta<sup>1,2\*</sup>, Emanuele La Corte<sup>1,2</sup>, Giulia Giannini<sup>2,3</sup>, Matteo Martinoni<sup>1</sup>, Paolo Mantovani<sup>1</sup>, Luca Albini-Riccioli<sup>4</sup>, Caterina Tonon<sup>2,5</sup>, Diego Mazzatenta<sup>2,6</sup>, Benjamin D. Elder<sup>7</sup>, Alfredo Conti<sup>1,2</sup>

\* The two authors equally contributed to the manuscript.

**Affiliations:**

1. Department of Neurosurgery, IRCCS Istituto delle Scienze Neurologiche di Bologna, Bologna, Italy.
2. Department of Biomedical and NeuroMotor Sciences (DIBINEM), University of Bologna, Italy.
3. Neurology Unit (NEUROMET), IRCCS Istituto delle Scienze Neurologiche di Bologna, Bologna, Italy.
4. Neuroradiology Unit, IRCCS Istituto delle Scienze Neurologiche di Bologna, Bologna, Italy.
5. Functional and Molecular Neuroimaging Unit, IRCCS Istituto delle Scienze Neurologiche di Bologna, Bologna, Italy.
6. Programma Neurochirurgia Ipofisi - Pituitary Unit, IRCCS Istituto delle Scienze Neurologiche di Bologna, Bologna, Italy.
7. Department of Neurologic Surgery, Mayo Clinic, Rochester, Minnesota.

**Correspondence to:**

Alessandro Carretta, MD  
IRCCS Istituto delle Scienze Neurologiche di Bologna, Department of Neurosurgery  
Via Altura 3, 40139, Bologna, Italy.  
Email: alessandro.carretta1@gmail.com

Supplementary Tables to the submission to Acta Neurochirurgica.

|              | Variable                  | Cutoff | Accuracy % | Sensitivity % | Specificity % | Youden Index (J) | OR    | 95% CI        |
|--------------|---------------------------|--------|------------|---------------|---------------|------------------|-------|---------------|
| LOVA VS LIAS | Age, y                    | 59.5   | 39.4       | 88.9          | 52.2          | 0.41             | 1.974 | 1.214 - 3.211 |
|              | Cranial Circumference, cm | 58.5   | 29.4       | 50            | 73.9          | 0.24             | -     | -             |
|              | Tentorial Angle, °        | 46.5   | 26.4       | 83.3          | 47.8          | 0.31             | 1.657 | 1.008 - 2.723 |
|              | Evans Index               | 0.365  | 45.8       | 88.9          | 47.8          | 0.37             | 1.974 | 1.214 - 3.211 |
|              | Third Ventricle Width, mm | 13.5   | 63         | 88.9          | 60.9          | 0.50             | 2.253 | 1.333 - 3.810 |
|              | Callosal Angle, °         | -      | -          | -             | -             | -                | -     | -             |
| LOVA VS iNPH | Age, y                    | -      | -          | -             | -             | -                | -     | -             |
|              | Cranial Circumference, cm | 56.5   | 51.8       | 83.3          | 53.1          | 0.36             | 1.320 | 1.100 - 1.585 |
|              | Tentorial Angle, °        | 46.5   | 13.4       | 83.3          | 45.3          | 0.27             | -     | -             |
|              | Evans Index               | 0.425  | 65.2       | 66.7          | 92.2          | 0.59             | 2.456 | 1.356 - 4.449 |
|              | Third Ventricle Width, mm | 18.5   | 52.4       | 50            | 95.3          | 0.45             | 2.429 | 1.196 - 4.936 |
|              | Callosal Angle, °         | -      | -          | -             | -             | -                | -     | -             |
| LIAS VS iNPH | Age, y                    | -      | -          | -             | -             | -                | -     | -             |
|              | Cranial Circumference, cm | 56.5   | 23.4       | 69.6          | 53.1          | 0.23             | -     | -             |
|              | Tentorial Angle, °        | -      | -          | -             | -             | -                | -     | -             |
|              | Evans Index               | 0.405  | 18.2       | 39.1          | 84.4          | 0.24             | -     | -             |
|              | Third Ventricle Width, mm | -      | -          | -             | -             | -                | -     | -             |
|              | Callosal Angle, °         | 77.5   | 34.4       | 65.2          | 81.2          | 0.46             | 1.661 | 1.162 - 2.374 |

**Supplementary Table 1.** Cutoff of continuous variables with percentage accuracy, sensitivity, specificity and Youden index, according to ROC curves. The two rightmost columns show the Odds Ratio with the 95% Confidence Interval of the cutoff value determined with contingency tables. AUC < 0.5 and not significant ORs were not reported.

| Variable                  | AUC   | Cutoff | Accuracy % | Sensitivity % | Specificity % | Youden Index (J) |
|---------------------------|-------|--------|------------|---------------|---------------|------------------|
| Age, y                    | 0.844 | 72.5   | 68.8       | 79.7          | 80.5          | 0.6              |
| Cranial circumference, cm | 0.679 | 56.5   | 35.8       | 75.6          | 53.1          | 0.287            |
| Evans index               | 0.695 | 0.405  | 39         | 53.7          | 84.4          | 0.381            |
| Third ventricle width, mm | 0.559 | 18.5   | 11.8       | 31.7          | 95.3          | 0.27             |
| Callosal angle, °         | 0.44  | -      | -          | -             | -             | -                |

**Supplementary Table 2.** Cutoff between iNPH and no iNPH cohorts of continuous variables with percentage accuracy, sensitivity, specificity and Youden index, according to ROC curves. Callosal angle, with an AUC < 0.5, was excluded from the diagnostic score and its diagnostic values are not reported.

| Variable                      | OR     | 95% CI          |
|-------------------------------|--------|-----------------|
| Age, y                        | 16.183 | 6.052 - 43.272  |
| Cranial circumference, cm     | 3.513  | 1.479 - 8.348   |
| Evans index                   | 6.253  | 2.511 - 15.568  |
| Third ventricle width, mm     | 9.44   | 2.49 - 35.792   |
| Sellar bone distortion        | 17.719 | 2.15 - 146.052  |
| Third ventricle floor bulging | 12.39  | 4.127 - 37.195  |
| DESH                          | 190    | 40.282 - 896.18 |
| Headache                      | 20.323 | 2.488 - 165.977 |
| Nausea and vomit              | 1.108  | 1.002 - 1.225   |
| Gait disturbances             | 1.206  | 1.05 - 1.386    |
| Urinary incontinence          | 5.211  | 1.908 - 14.236  |
| Cognitive impairment          | 6.667  | 2.55 - 17.431   |

**Supplementary Table 3.** ORs and 95% CI to discriminate iNPH and no iNPH cohorts of the variables included in the diagnostic score, according to contingency tables.
